# Supplementary material for: Boosting Resilience Attentional Bias in Previously Bullied University Students with Low Post-Traumatic Growth: A tDCS Study
Source: Preprints.org preprint supplement (doi:10.20944/preprints202410.0697.v1), 2024-10-10
Supplement: Supplementary file 1 [file supplementary]

**Table 4.** Regression coefficients and confidence intervals in two simple moderation models, computed separately for anodal and sham conditions

| **Anodal** **condition** | | | | | | | | | |
| --- | --- | --- | --- | --- | --- | --- | --- | --- | --- |
| **Outcome Variable** | **Predictor variable** | **COEFF** | ***SE*** | ***t*** | **LLCI** | **ULCI** | ***p*** | ***R*2** | ***F*** |
| Attentional bias | PTG | -0.01 | 0.13 | -1.60 | -0.54 | 0.08 | 0.13 | 0.61 | 7.26 |
|  | BAS | -0.03 | 0.13 | -0.16 | 0.37 | -0.32 | 0.87 |  |  |
|  | Int_1 | -0.36 | 0.15 | -2.46 | -0.68 | -0.05 | 0.03 |  |  |
| Conditional effects of PTG at values of approach motivation as moderator | | | | | | | | | |
|  | -0.72 | 0.03 | -0.21 | 0.15 | -0.41 | 0.47 | 0.88 |  |  |
|  | 0.19 | -0.29 | 0.13 | -2.20 | -0.59 | -0.01 | 0.04 |  |  |
|  | 0.65 | -0.46 | 0.14 | -3.31 | -0.76 | -0.16 | 0.00 |  |  |
| **Sham condition** | | | | | | | | | |
| Attentional bias | PTG | -0.57 | 0.30 | -1.90 | -1.22 | 0.07I | 0.07 | 0.29 | 1.89 |
|  | BAS | 0.54 | 0.29 | 1.84 | -0.09 | 1.16 | 0.09 |  |  |
|  | Int_1 | -0.35 | 0.26 | -1.32 | -0.92 | 0.21 | 0.21 |  |  |

LLCI, lower level of the 95 % confidence interval; ULCI, upper level of the 95 % confidence interval; SE, Standard Error.
